# Supplementary material
Source: publisher figshare collection journal article supplement (https://brill.figshare.com/articles/dataset/_/24638475)
Supplement: Supplementary file 1 [file 1]

## Sheet: Scutellation
Catalogue	Species	Sex	Dorsals	Transversals	Ventrals	Femoral pores	Supraoculars	Frontals	Frontonasals	Intercanthals	Internasals	Postrostrals	Preoculars	Postoculars	Suboculars	Canthals	Loreals	Supralabials	Infralabials	Auricular lobules	Subdigital lamellae	Scales from occiput to posterior edge of the dark nuchal collar	Scales between femoral pores series
MZFC 20876	S. geminus sp. nov.	Male	26	36	46	32	10	2	3	5	2	4	2	4	2	2	2	8	10	6	23	12
MZFC 20872	S. geminus sp. nov.	Female	28	33		26	8	2	3	6		4	2	4	2	3	2		8	9	18	13
MZFC 20877	S. geminus sp. nov.	Female	27	32	45	31	8	2	3	5	3	3	2	4	2	3	2	8	10	8	19	11	6
MZFC 24349	S. geminus sp. nov.	Female	26	34	43	32	8	2	3	3	2	4	2	4	2	2	2	8	10	7	21	12	5
MZFC 11197	S. geminus sp. nov.	Female	26	31	46	31	8	2	3	3	2	4	2	4	2	4	2	8	10	6	19	12	5
MZFC 11198	S. geminus sp. nov.	Male	26	35	46	33	8	2	3	4	2	4	2	4	2	4	2	8	10	6	19	11	4
MZFC 20874	S. geminus sp. nov.	Male	26	35		31	8	2	3	4	4	4	2	4	2	3	2		8	10	19	11	4
MZFC 9287	S. geminus sp. nov.	Female	26	30	42	26	10	2	3	3	6		2	4	2	4	2	8	10	6	19	12	6
MZFC 12020	S. geminus sp. nov.	Female	26	32	46	30	8	2	3	2	2	4	2	3	2	4	2	8	9	6	20	14	6
MZFC 9911	S. geminus sp. nov.	Male	25	31	42	30	8	2	3	3	2	4	2	4	2	2	2	8	10	6	19	10	5
MZFC 6921	S. geminus sp. nov.	Female	26	30	42	27	8	2	3	4		4	2	4	2	2	2	8	11	8	19	11	6
MZFC 6922	S. geminus sp. nov.	Male	26	34	43		8	2	3	3	2	3	3	3	2	3	2	8	10	6	18	13	5
MZFC 8971	S. geminus sp. nov.	Male	25	32	45	35	8	2	3	3	2	4	2		2	4	2	8	9	6	19	11	6
MZFC 8973	S. geminus sp. nov.	Male	27	32	48	32	8	2	3	3	4	4	2	4	2	2	2	8	10	6	21	11	6
MZFC 8426	S. geminus sp. nov.	Male	26	32	42	27	8	2	3	3	2	4	4	4	2	4	2	8	10	5	19	11	5
MZFC 8427	S. geminus sp. nov.	Female	29	34	45	32	9	2	3	4	4	4	2	4	2	4	2	8	10	7		11	5
MZFC 9134	S. geminus sp. nov.	Female	26	30	41	29	8	2	3	6	3	4	2	4	2	3	2	8	10	6	19	13	4
MZFC 9290	S. geminus sp. nov.	Male	28	34	46	31	8	2	3	4	7	4	2	4	2	4	2	8	10	6	20	13	7
MZFC 9858	S. geminus sp. nov.	Male	29	32	44	32	8	2	3	4	7	4	2	4	2	4	2	8	9	5	21	12	6
MZFC 9289	S. geminus sp. nov.	Female	26	30	42	30	8	2	3	4	4	3	2	4	2	2	2	8	11	4	17	11	6
MZFC 8424	S. geminus sp. nov.	Male	26	32	43	27	8	2	3	3	3	4	2	4	2	4	2	7	7	6	21	12	6
MZFC 9291	S. geminus sp. nov.	Male	27	33	44	30	8	2	3	4	5	4	2	4	2	4	2	9	10	4	21	12	7
MZFC 9614	S. geminus sp. nov.	Male	26	32	41	30	8	2	3	2	2	4	2	4	2	4	2	8	10	6	20	11	4
MZFC 9292	S. geminus sp. nov.	Female	26	33	43	33	8	2	3	4	4	4	2	4	2	4	2	8	10	7	20	13	6
MZFC 32112	S. geminus sp. nov.	Female	26	30		30	8	2	3	4	3	4	2	4	2	2	2	8	9	6	20	12	5
MZFC 9857	S. geminus sp. nov.	Female	28	31	44		8	2	3	3	5	3	2	4	2	4	2	8	9	4	19	13	7
IBH 16564	S. geminus sp. nov.	Male	27	33	42	30	8	2	3	6	2	4	4	4	2	2	2	8	10	6	19	12	5
IBH 16555	S. geminus sp. nov.	Female	28	30	40	32	8	2	3	4	2	4	2	4	2	2	2	8	10	6	22	13	4
IBH 4050	S. geminus sp. nov.	Female	27	32	40	29	8	3	3	4	4	4	2	4	2	4	2	8	10	8	20	11	5
IBH 3705	S. geminus sp. nov.	Female	26	32	42	30	8	2	3	3	4	4	2	3	2	4	2	8	12	7	20	11	5
MZFC 35679	S. geminus sp. nov.	Male	26	32	43	29	8	2	3		2	4	2	4	2	2	2	8	8	6	19	11	6
MZFC 35681	S. geminus sp. nov.	Male	28	32	43	33	8	2	3	3	3	4									23	13	6
MZFC 35678	S. geminus sp. nov.	Female	27	31	41	31	8	2	3	3	3	4	3	5	2	4	3	8	8	6	22	12	6
MZFC 35677	S. geminus sp. nov.	Female	27	31	42	28	8	2	3	2	2	4	2	4	2	2	2	8	10	6	20	12	6
MZFC 35675	S. geminus sp. nov.	Male	29	33	45	28	8	2	3	4	2	4	2	4	2	4	2	8	11	6	19	14	6
MZFC 35676	S. geminus sp. nov.	Female	28	32	41	30	8	2	3	4	4	4	4	4	2	4	2	8	10	8	21	13	6
MZFC 35674	S. geminus sp. nov.	Male	29	38	44	33	8	2	3	4	4	4	2	3	2	4	3	7	9	6	21	13	6
MZFC 35673	S. geminus sp. nov.	Female	27	32	42	31	8	2	3	4	3	4	2	4	2	4	2	8	10	6	21	13	6
MVZ 146914	S. geminus sp. nov.	Female	27	35	44	30	8	2	5	5	3	4	4	4	2	4	2	8	11	6	20	12	5
MVZ 129262	S. geminus sp. nov.	Male	26	32	46	32	10	2	3	2	2	4	2	4	2	4	2	8	10	6	21	10	5
MVZ 129263	S. geminus sp. nov.	Male	25	33	47	32	8	2	3	4	2	4	2	4	2	2	2	8	8	6	21	10	7
MVZ 186504	S. geminus sp. nov.	Male	24	32	43	31	9	2	3	4	3		2	4	2	4	2		10	4	19	11	7
MVZ 78281	S. geminus sp. nov.	Male	27	34	48		8	2	3	2	3	4	2	4	2	4	2	8	10	6	21	14	6
MVZ 78282	S. geminus sp. nov.	Female	28	37	46		8	2	3	4	2	4	4	4	2	4	2	8	12	4	20	13	5
MVZ 78283	S. geminus sp. nov.	Female	27	31	44		9	2	3	2	3	4	4	4	2	4	2	10	10	4	19	12	4
MZFC 33875	S. madrensis	Female	28	34	46	29	8	2	3	4	2	4	2	3	2	4	2	8	9	6	22	15	6
MZFC 33876	S. madrensis	Female	28	35	48	29	8	2	3	2	2	4	2	4	2	4	2	9	10	7	20	12	6
MZFC 33877	S. madrensis	Female	29	35	47	34	8	2	5	4	2	4	2	4	2	4	2	8	9	8	19	13	6
MZFC 33878	S. madrensis	Female	28	34	48	30	9	2	6	4	4	4	2	4	2	4	2	8	8	6	19	14	6
MZFC 33879	S. madrensis	Female	28	34	44	28	9	2	3	4	2	4	4	4	2	4	2	8	10	6	20	15	6
MZFC 33880	S. madrensis	Male	28	37	48	28	8	2	3	4	5	4	2	4	2	4	2	8	10	6	20	13	7
MZFC 33881	S. madrensis	Female	29	35	46	30	8	2	3	5	4	4	3	4	2	4	2	8		8	19	13	7
MZFC 33882	S. madrensis	Female	29	36	44	29	8	2	3	5	4	4	2	4	2	4	3	8	8	6	20	14	7
MZFC 33883	S. madrensis	Female	29	36	49	30	8	2	3	6	4	4	2	2	2	4	2	9	10	6	19	15	6
MZFC 33884	S. madrensis	Female	29	34	44	30	9	2	3	6	4	3	2	4	2	4	2		9	10	22	12	7
MZFC 33885	S. madrensis	Female	29	35	46	29	9	2	3	6	3	4	2	4	2	4	2	9	12	5	19	14	7
MZFC 33931	S. madrensis	Female	26	35	47	31	8	2	4	4	3	4	2		2	4	2			8	18	12	6
MZFC 33939	S. madrensis	Female	27	34	47	29	8	2	3	4	3	4	2	4	2	4	3	7	9	8	21	14	6
MZFC 33945	S. madrensis	Male	31	35	53	33	10	2	3	4	3	4	4	4	2	4	3	8	10	6	23	16	6
MZFC 33946	S. madrensis	Male	28	35	48	27	10	2	3	5	5	4	4	4	2	4	2	8	8	6	21	14	5
MZFC 33949	S. madrensis	Female	29	34	51	29	10	2	3	5	3	3	2	2	2	2	2	8	11	7	22	15	6
MZFC 33951	S. madrensis	Female	29	34	51	28	8	2	5	4	4	4	2	4	2	4	2	8	10	7	21	15	8
MZFC 33953	S. madrensis	Male	29	39	56	32		2	3	4	4	2	4	4	2	4	3	8	12	6	21	15	8
MZFC 34008	S. madrensis	Male	29	36	51	30	10	2	3	4	4	4	2	4	2	4	2	10	11	8	20	15	6
MZFC 34009	S. madrensis	Male	29	39	52	34	8	3	5	7	5	5	4	4	2	4	4	9	10	8	20	15	7
MZFC 34004	S. madrensis	Female	27	35	47	30	8	2	3	3	3	4	2	2	2	4	2	8	10	6	19	13	7
MZFC34061	S. madrensis	Male	28	36	47	28	11	2	3	5	2	4	2	4	2	4	2		10	8	20	14	5
MZFC 33893	S. madrensis	Female	28	35	50		10	2	4	4	4	4	3	4	2	4	2	8	10	5	22	12	7
MZFC 33895	S. madrensis	Female	28	39	47	30	8	2	3	6	3	4	3	4	2	4	2	8	10	6	19	13	5
MZFC 33998	S. madrensis	Male	30	38	50	31	8	2	3	3	4	4	2	4	2	2	2	8	9	5	20	14	7
MZFC 33894	S. madrensis	Male	30	41	51	30	10	2	3	7	3	4	2	4	2	4	2	9	12	8	20	14	5
MZFC 33981	S. madrensis	Female	28	39	53	34	8	2	5	6	4	4	2	3	2	4	2	8	10	6	19	14	7
MZFC 8505	S. madrensis	Female	29	38	50		9	2	3	5	4	4	4	4	2	2	2	8	10	4	23		7
MZFC 755	S. mikeprestoni	Male	26	34	42	26	8	2	3	2	3	4	4	4	2		4	8	9	6	20		6
MZFC 5368	S. mikeprestoni	Male	27	33	46	28	8	2	3	3	3	3	2	4	2	4	6	8	10	7	19	13
MZFC 21268	S. mikeprestoni	Male	29	33	45	30	8	2	3	3	2	4	2		2	4	2	7		8	18	12	6
MZFC 31901	S. mikeprestoni	Female	29	37	44	27	8	2	3	2	4	3	4	3	2	4	2	8	10	6	18	14	7
MZFC 31902	S. mikeprestoni	Female	27	34	44	28	9	2	4	4	3	5	4	3	2	4	2	8	10	6	21	13	4
MZFC 31903	S. mikeprestoni	Male	27	43	47		8	2	3	3	3	3	3	2	2	2	2	8	10	4		12
MZFC 31904	S. mikeprestoni	Female	27	40	46		8	2	3	3	3	3	2	2	2	2	2	8	9	4		12	6
MZFC 31905	S. mikeprestoni	Male	28	34	45	28	8	2	4	2	2	4	2	2	2	4	2	8	9	6	19	14	5
MZFC 31906	S. mikeprestoni				48
MZFC 31907	S. mikeprestoni	Female	25	34	43	26	8	2	3	4	2	4	2	3	2	2	2	8	9	7	18	12	8
MZFC33954	S. mikeprestoni	Male	30	36	49	32	9	4	3	3	3	4	4	4	2	2	2	8	10	8	22	9	6
MZFC33957	S. mikeprestoni	Male	30	37	45	28	8	2	3	4	3	3	4	4	2	4	2	8	8	7	20	15	5
MZFC33958	S. mikeprestoni	Male	27	35	47	25	8	2	4	6	2	4	2	4	2	2	2	8	10	7	19	13	6
MZFC34003	S. mikeprestoni	Female	28	32	47	26	8	2	3	2	2	3	2	3	2	4	2	8	12	6	19	13	6
MZFC34005	S. mikeprestoni	Female	28	32	47	29	8	2	3		2	4	2	4	2	4	3	9	10	6	19	12	7
MZFC34007	S. mikeprestoni	Male	26	35	48	30	10	2	3	3	4	4	2	4	2	4	2	8		6	19	12	6
ENCB 5757	S. mikeprestoni	Female	30	37	40	28	10	2	3	3	3	4	2	2	2	4	2	8	10	6	21		6
ENCB 5758	S. mikeprestoni	Male	27	36	40	29	8	2	3	2	3	4	2	2	2	2	2	8	10	5	19		6
ENCB 5759	S. mikeprestoni	Female	27	31	39	27	8	2	3	2	2	4	2	2	2	2	2	8	8	4	19	13	5
ENCB 5761	S. mikeprestoni	Female	28	38	41	28	8	2	3	2	4	4	2	4	2	2	2	8	10	6	21	12	6
ENCB 5762	S. mikeprestoni	Female	29	36	43	26	8	2	3	3	2	4	2	3	2	3	2	8	10	4	18	13	7
ENCB 5763	S. mikeprestoni	Female	25	33	43	26	10	2	3	2	4	2	2	4	2	2	2				19		5
MZFC 747	S. binocularis	Female	29	32	40	28	9	1	3	3	3	5	2	4	2	4	2	8	11	6		12	4
MZFC 7420	S. binocularis	Male	28	29	39	26	8	2	3	3	2	4	2	4	2	4	2	8	10	7		13	4
MZFC 7421	S. binocularis	Female	26	29	40	28	8	2	3	2	3	4	2	4	2	4	2	8	10	6		13	4
MZFC 11218	S. binocularis	Female	28	33	40		8	3	6	3	4	4	2	2	2	4	2	8	12	6		13
MZFC 11222	S. binocularis		23	33	40	26	8	2	3	4	2	4	2	4	2	4	2	8	12	6		11	4
MZFC 11223	S. binocularis	Female	26	29	40	26	8	2	3	4	4	3	2	4	2	4	2	8	12	6
MZFC 11224	S. binocularis	Female	26	36	38			2	3	3	4	4	2	2	2	4	2	8	11	6		12
MZFC 11226	S. binocularis	Female	28	29	40	30	8	2	3	8	2	4	2	4	2	4	2	8	12	6		13	4
MZFC 24487	S. binocularis	Female	30	32	40	26	8	2	3	4	5	3	2	4	2	4	2	8	10	7		14	4
MZFC 24650	S. binocularis	Male	28	33	39	26	8	2	3	4		3	2	4	2	4	2	8	8	6		13	5
MZFC 35687	S. binocularis	Female	28	33	43	26	8	2	3	4	4	3	2	4	2	4	2	8	10	7		13	4
MZFC 35688	S. binocularis	Male	28	30	38	26	8	2	3	2	3	2	2		2		2	8	10	6		12	4
IBH 16635	S. binocularis	Male	29	34	40	32	8	2	3	2	4	3	3	3	2	2	2	8	8	6		12	4
