# Supplementary material
Source: publisher figshare collection journal article supplement (https://brill.figshare.com/articles/dataset/_/24638475)
Supplement: Supplementary file 1 [file 1]

More cryptic diversity among spiny lizards of the *Sceloporus*  
*torquatus* complex discovered through a multilocus approach

Gustavo Campillo-García<sup>1</sup>, Oscar Alberto Flores-Villela<sup>1,\*</sup>, Brett Oliver

Butler<sup>1,2</sup>, Miriam Benabib<sup>1</sup>, Riccardo Castiglia<sup>3</sup>

1 - Museo de Zoología “Alfonso L. Herrera”, Facultad de Ciencias, Universidad Nacional  
Autónoma de México, Av. Ciudad Universitaria 3000, C.P. 04510, Coyoacán, CDMX,  
México

2 - Posgrado en Ciencias Biológicas, Universidad Nacional Autónoma de México, Av.  
Ciudad Universitaria 3000, C.P. 04510, Coyoacán, CDMX, México

3 - Dipartimento di Biologia e Biotechnologie “Charles Darwin”, Università di Roma ‘La  
Sapienza’, via A. Borelli 50, CAP 00151, Rome, Italy

\*Corresponding author; e-mail: ofvq@unam.mx

**Supplementary material**

**Table S1.** Morphometric data for all examined specimens in this work.

**Table S2.** Scutellation data for all examined specimens in this work.

**Table S3.** Specimen voucher and locality information for all examined specimens in this work.

**Table S4.** List of specimens used for the genetic analyses, including locality information and GenBank numbers. Sequences generated for this work are in bold.
